# Supplementary material
Source: PubMed Central journal article supplement (PMC4079362)
Supplement: supp_tpc.114.125047_tpc125047_SupplementalData.pdf [file supp_tpc.114.125047_tpc125047_SupplementalData.pdf]

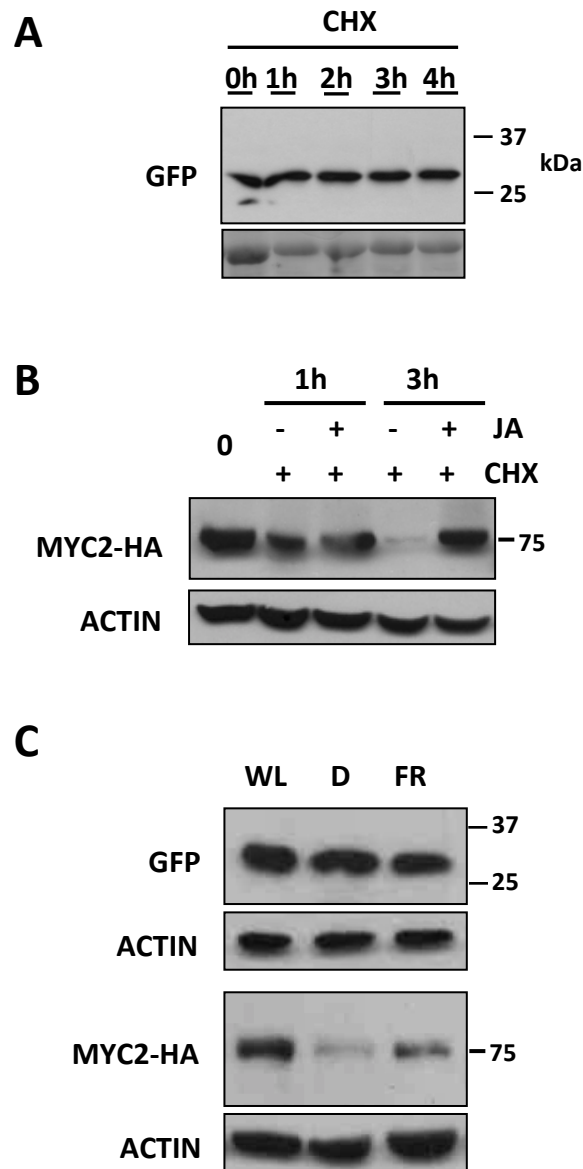

**Supplemental Figure 1. Immunoblot analysis of GFP and MYC2-HA in 35S:GFP and 35S:MYC2-HA transgenic plants.**

**(A)** Immunoblot analysis of GFP levels in seven-day-old 35S:GFP transgenic seedlings treated with 50 $\mu$ M cycloheximide (CHX) and harvested at indicated times. Protein molecular mass is shown on the right side. Ponceau staining shows loading control in the bottom panel

**(B)** Immunoblot analysis of MYC2-HA and actin proteins levels in seven-day-old 35S:MYC2-HA transgenic seedlings treated with 50 $\mu$ M cycloheximide (CHX) and 50 $\mu$ M JA or mock, and harvested at indicated times. Protein molecular mass is shown on the right.

**(C)** Immunoblot analyses of GFP, MYC2-HA and actin protein levels in 35S:GFP and 35S:MYC2-HA seedlings grown in white light/dark cycles (WL/D, 16/8 hours) for four days and transferred 24h to white (WL), dark (D) or far-red (FR) light. Protein molecular mass is shown on the right side.

These experiments were repeated three times with similar results.

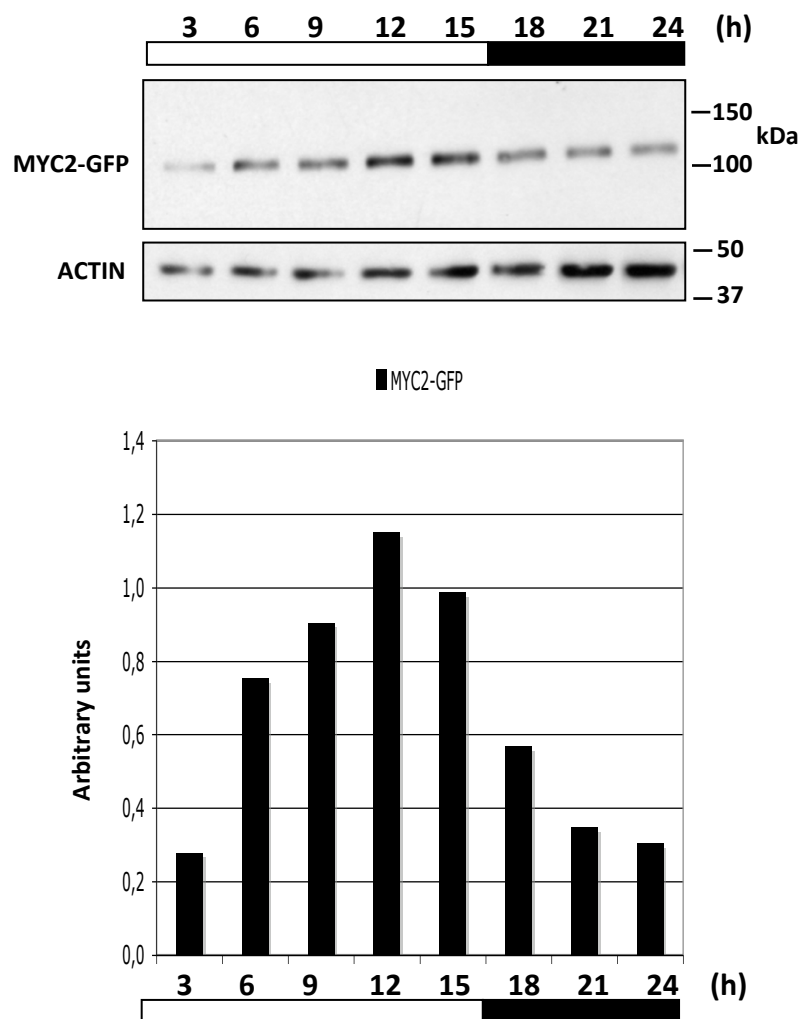

**Supplemental Figure 2. Daily variation of MYC2 protein levels.**

Immunoblot analysis (Top) and graphical representation (Bottom) of MYC2-GFP and actin protein levels in 35S:MYC2-GFP transgenic plants in wild-type during a complete day/night cycle. White rectangle indicates light period and black rectangle indicates dark. Samples were taken at the indicated times (hours) after dawn (chamber illumination). Protein molecular mass is shown on the right. This experiment was repeated three times with similar results.

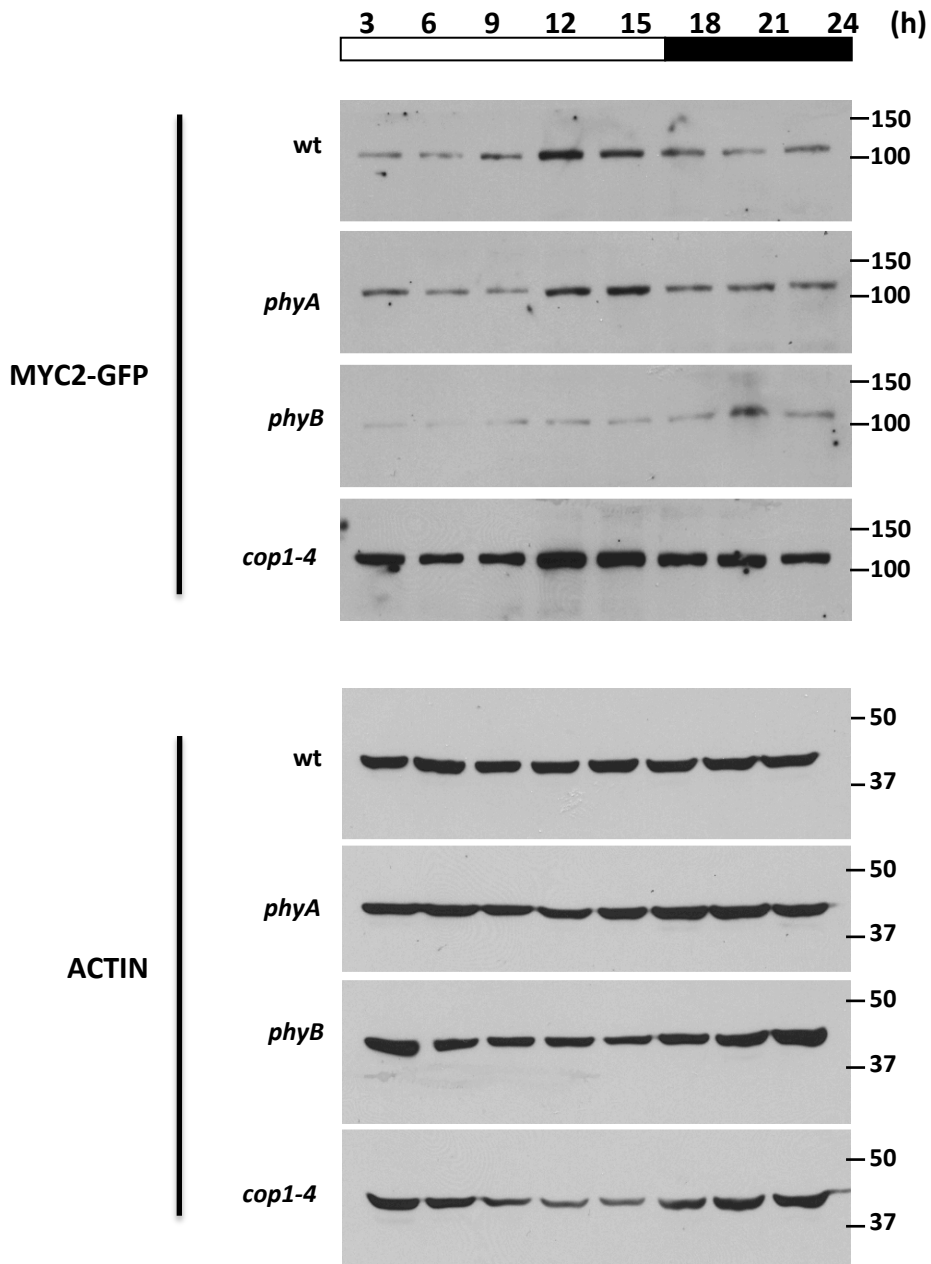

**Supplemental Figure 3. Effects of *phyA*, *phyB* and *cop1* mutations in daily variation of MYC2 protein levels.**

Immunoblot analyses of MYC2-GFP and actin protein levels in 35S:MYC2-GFP transgenic plants in wild-type, *phyA*, *phyB* and *cop1* backgrounds, during a complete day/night cycle. White rectangle indicates light period and black rectangle indicates dark. Samples were taken at the indicated times (hours) after dawn (chamber illumination). Protein molecular mass is shown on the right. This experiment was repeated twice with similar results.

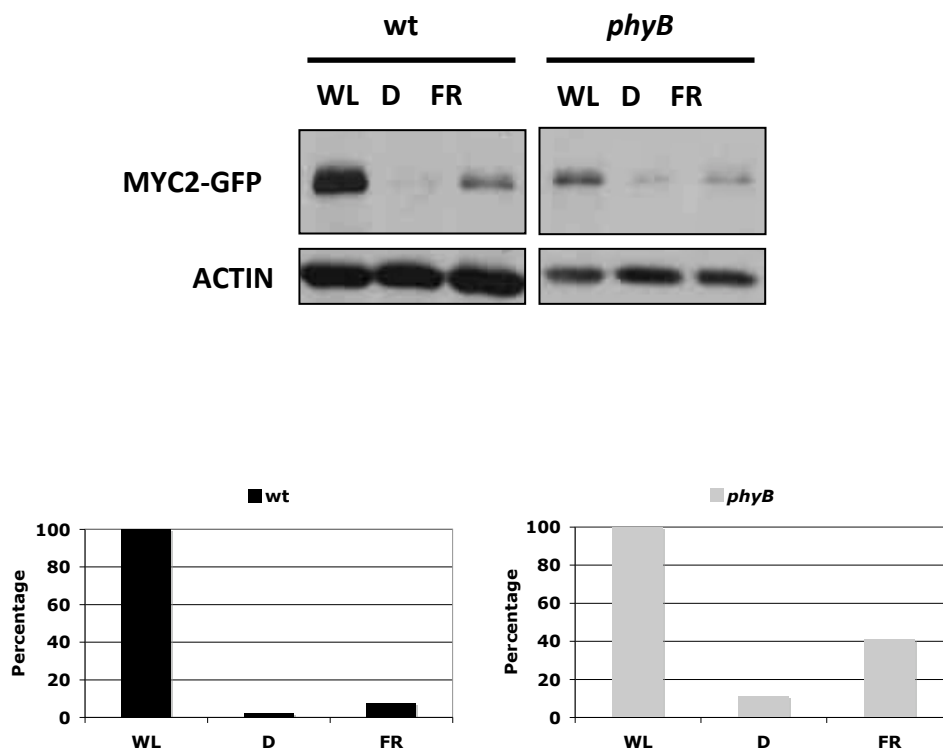

**Supplemental Figure 4.** Immunoblot analysis (top) of MYC2-GFP and actin protein levels in 35S:MYC2-GFP transgenic plants in wild-type and *phyB* backgrounds. Seedlings were grown in white light/dark cycles (16/8 hours) for four days and transferred 24h to white (WL), dark (D) or far-red (FR). Quantification (bottom) of the intensity of the bands shown in (A) and expressed as percentage of the intensity in WL condition. The intensity of each band is normalized to its corresponding Actin control.

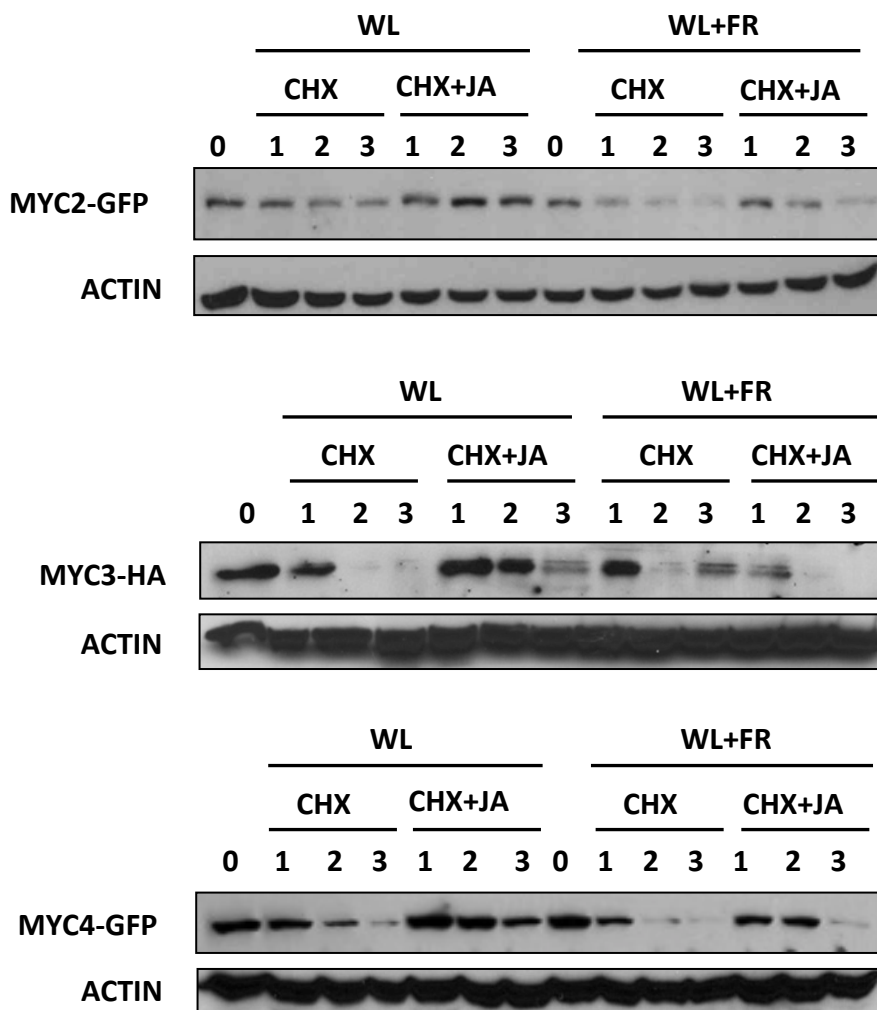

**Supplemental Figure 5. Immunoblot analysis of MYC2-GFP, MYC3-HA, MYC4-GFP and actin protein levels in 35S:MYC2-GFP, 35S:MYC3-HA and 35S:MYC4-GFP transgenic plants.**

Seedlings grown in white light/dark cycles (16/8 hours) were exposed to white light (WL) or FR-enriched white light (WL+FR) for four hours and then treated with 50 $\mu$ M cycloheximide (CHX) and 50 $\mu$ M JA or mock (DMF) and harvested at indicated times (1, 2 and 3 correspond to 20, 40 and 60 minutes, respectively). Protein molecular mass is shown on the right side. The experiments were repeated three times with similar results.

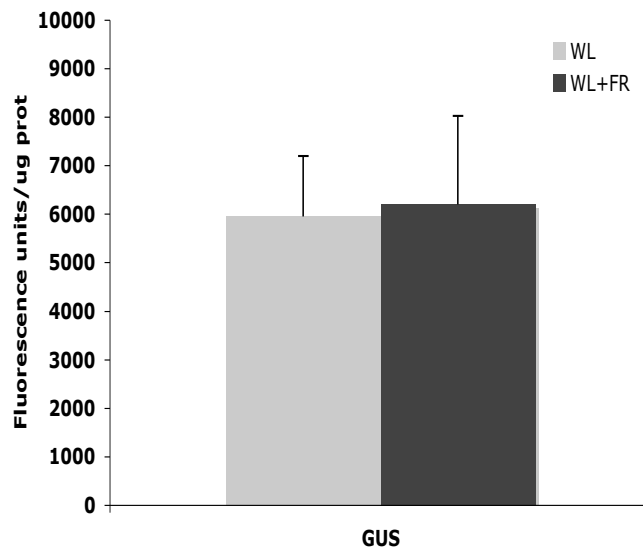

**Supplemental Figure 6. Quantification of GUS activity in control plants (35S:GUS transgenics).**

Seedlings grown in white light/dark cycles (16/8 hours) were exposed to white light (WL) or FR-enriched white light (WL+FR) for four hours. This experiment was repeated twice with similar results.

**Supplemental Table1.** Primers used to amplify *JAZ sequences* in 35S:*JAZ-GUS* constructs.

attB1\_JAZ2

GGGGACAAGTTTGTACAAAAAAGCAGGCTTCATGTCGAGTTTTTCTGCCG

attB2stop\_JAZ2

GGGACCACTTTGTACAAGAAAGCTGGGTCTTACCGTGAAGTGAAGCAAG

attB1\_JAZ5

GGGGACAAGTTTGTACAAAAAAGCAGGCTTCATGTCGTCGAGCAATGAA

attB2stop\_JAZ5

GGGACCACTTTGTACAAGAAAGCTGGGTCTTACTATAGCCTTAGATCGAG

attB1\_JAZ6

GGGGACAAGTTTGTACAAAAAAGCAGGCTTCATGTCAACGGGACAAGCG

attB2stop\_JAZ6

GGGACCACTTTGTACAAGAAAGCTGGGTCTTACTAAAGCTTGAGTTCAAG

attB1\_JAZ7

GGGGACAAGTTTGTACAAAAAAGCAGGCTTCATGATCATCATCATCAAAAC

attB2stop\_JAZ7

GGGACCACTTTGTACAAGAAAGCTGGGTCTTACTATCGGTAACGGTGTA

attB1\_JAZ8

GGGGACAAGTTTGTACAAAAAAGCAGGCTTCATGAAGCTACAGCAAATTG

attB2stop\_JAZ8

GGGACCACTTTGTACAAGAAAGCTGGGTCTTATCGTCGTGAATGGTACG

attB1\_JAZ9

GGGGACAAGTTTGTACAAAAAAGCAGGCTTCATGGAAAGAGATTTTCTG

attB2stop\_JAZ9

GGGACCACTTTGTACAAGAAAGCTGGGTCTTATGTAGGAGAAGTAGAAGA

attB1\_JAZ10

GGGGACAAGTTTGTACAAAAAAGCAGGCTTCATGTGCGAAAGCTACCATA

attB2stop\_JAZ10

GGGACCACTTTGTACAAGAAAGCTGGGTCTTATTAGGCCGATGTCCGATA

attB1\_JAZ11

GGGGACAAGTTTGTACAAAAAAGCAGGCTTCATGGCTGAGGTAAACGGA

attB2stop\_JAZ11

GGGACCACTTTGTACAAGAAAGCTGGGTCTTATCATGTGACAATGGGGCT

attB1\_JAZ12

GGGGACAAGTTTGTACAAAAAAGCAGGCTTCATGACTAAGGTGAAAGAT

attB2stop\_JAZ12

GGGACCACTTTGTACAAGAAAGCTGGGTCTTACTAAGCAGTTGGAAATTC
